# Supplementary material for: Direct patterning of composite biocompatible microstructures using microfluidics
Source: Royal Society of Chemistry journal article supplement (doi:10.1039/b700869d), 2007-01-01
Supplement: b700869d.pdf [file b700869d.pdf]

Supplementary Material (ESI) for Lab on a Chip  
This journal is © The Royal Society of Chemistry 2007

**Supplementary Information for:**

**Direct patterning of composite biocompatible microstructures using microfluidics**

Yuk Kee Cheung, Brian M. Gillette, Ming Zhong, Sharmilee Ramcharan, and  
Samuel K. Sia\*

*Columbia University, Department of Biomedical Engineering, 351  
Engineering Terrace, 1210 Amsterdam Ave., New York, New York, 10027.*

**Fig. I.** Schematic representations of composite structure patterns for Figs. 1-4. The numbers within each panel indicate the cycle number for a particular structure. The top left and top middle panels represent patterns created using a widefield fluorescence microscope and the top right and bottom panels represent patterns created using a confocal microscope.

**Table I.** Combinations of fluorescent dyes/beads used to fabricate the microstructures in Figs. 1-4. Cycle numbers correspond to the structures schematized in the panels in Fig I.

**Fig. II.** 3T3 fibroblasts encapsulated in PEG-DA with LIVE/DEAD cytotoxicity assay stain. Radical generation during the excitation of photoinitiator has shown to cause cell death in previous work.<sup>1,2</sup> We examined the cytotoxic effect of photocrosslinking PEG-DA by Irgacure 2959 at 365 nm. We observed a 95% fibroblast viability, which agreed with the values reported previously in the literature.<sup>1,3</sup>

**Fig. III.** Resolution measurement of a microstructure fabricated with a confocal laser scanning microscope. Using ImagePro digital image analysis software, we measured a minimum spatial resolution of 2.5 $\mu$ m using a 10x 0.5 N.A. air objective in the confocal system. Using a conventional fluorescent microscope (Leica) with a 40x 1.25 N.A. oil immersion objective, we obtained a resolution of 40  $\mu$ m, which was the projected diameter of the smallest aperture (data not shown).

**Fig. I**

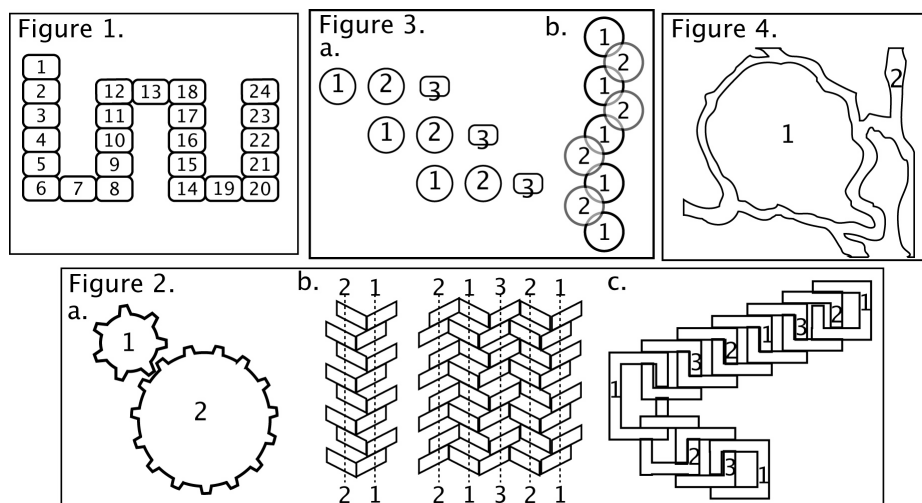

**Table I**

| <i>Figure</i> | <i>Cycle*</i> | <i>Polymer composition</i>                                                                       |                                                                     | <i>Solvent</i>           |
|---------------|---------------|--------------------------------------------------------------------------------------------------|---------------------------------------------------------------------|--------------------------|
| Fig. 1c       | 1,7,13,19     | 3, 2.5, 2, 1.5mM Fluorescein                                                                     |                                                                     | 10X TRIZMA buffer (pH 8) |
|               | 2,8,14,20     | 3, 2.5, 2, 1.5mM Rhodamine B                                                                     |                                                                     |                          |
|               | 3,9,15,21     | 3, 2.5, 2, 1.5mM Hoechst 33342                                                                   |                                                                     |                          |
|               | 4,10,16,22    | 2.5, 2, 1.5, 1mM Fluorescein + Rhodamine B                                                       |                                                                     |                          |
|               | 5,11,17,23    | 2.5, 2, 1.5, 1mM Fluorescein + 2.5, 2, 1.5, 1.5mM Hoechst 33342                                  |                                                                     |                          |
|               | 6,12,18,24    | 2.5, 2, 1.5, 1mM Rhodamine B + 2.5, 2, 1.5, 1.5mM Hoechst 33342                                  |                                                                     |                          |
| Fig. 2a       | 1             | 1mM Fluorescein                                                                                  | 40%w/v PEG-DA, 200uM Eosin Y, 0.4%v/v NVP, 1.5%v/v Triethanolamine. | 1X PBS                   |
|               | 2             | 1mM Rhodamine B                                                                                  |                                                                     |                          |
| Fig. 2b/2c    | 1             | 1mM Fluorescein                                                                                  |                                                                     |                          |
|               | 2             | 1mM Rhodamine B                                                                                  |                                                                     |                          |
|               | 3             | 1mM 7-(diethylamino) coumarin-3-carboxylic acid                                                  |                                                                     |                          |
| Fig. 3a       | 1             | 1mM Rhodamine B                                                                                  | 50%w/v TMPTA, 3%w/v I2959, 0.4% v/v NVP                             | 100% Ethanol             |
|               | 2             | 1mM 7-(diethylamino) coumarin-3-carboxylic acid                                                  | 50%w/v TMPEGTA, 3%w/v I2959, 0.4% v/v NVP                           |                          |
|               | 3             | 1mM Rhodamine B                                                                                  | 50%w/v HEX-DA, 3%w/v I2959, 0.4% v/v NVP                            |                          |
| Fig. 3b       | 1             | With 0.5µm beads                                                                                 | 0.27mM Rhoadmine B, 92%w/v PEGDA, 2%w/v I2959, 0.4%v/v NVP          | 100% Ethanol             |
|               | 2             | No beads                                                                                         |                                                                     |                          |
| Fig. 4        | 1             | 10%w/v PEG-DA, 100µM Eosin Y, 1.5%v/v Triethanolamine, 0.4% v/v NVP, 5x10 <sup>6</sup> cells/mL. |                                                                     | 3T3 serum media          |
|               | 2             | 10%w/v PEG-DA, 100µM Eosin Y, 1.5%v/v Triethanolamine, 0.4%v/v NVP, 1mM Rhodamine B.             |                                                                     |                          |

Supplementary Material (ESI) for Lab on a Chip  
This journal is © The Royal Society of Chemistry 2007

**Fig. II**

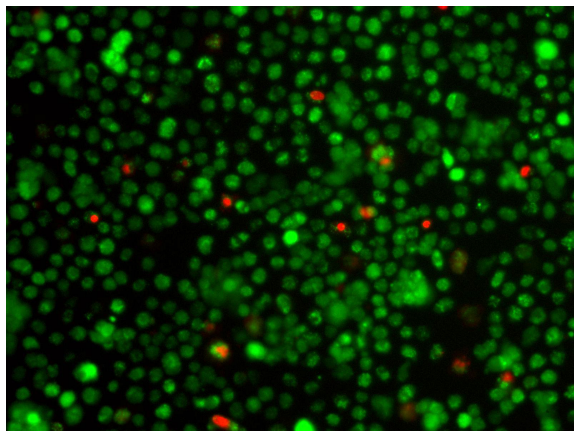

**Fig. III**

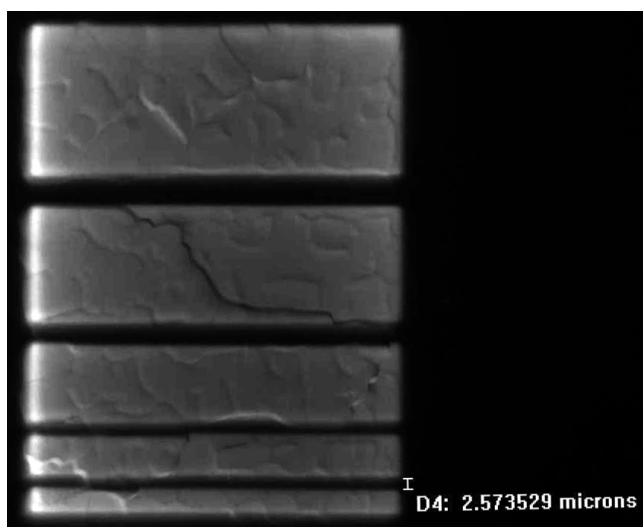

### References

1. D. R. Albrecht, V. L. Tsang, R. L. Sah and S. N. Bhatia, *Lab Chip*, 2005, **5**, 111-118.
2. J. S. Miller, M. I. Bethencourt, M. Hahn, T. R. Lee and J. L. West, *Biotechnol Bioeng*, 2006, **93**, 1060-1068.
3. J. Yeh, Y. Ling, J. M. Karp, J. Gantz, A. Chandawarkar, G. Eng, J. Blumling, 3rd, R. Langer and A. Khademhosseini, *Biomaterials*, 2006, **27**, 5391-5398.
